# Supplementary material
Source: PubMed Central journal article supplement (PMC3375372)
Supplement: NIHMS378492-supplement-Figure_S1.pdf [file NIHMS378492-supplement-Figure_S1.pdf]

**Online Supplementary Figure S1:** Plot of pair-wise linkage disequilibrium values in patients with SSc based on the GWAS genotype data (Radstake et al. *Nat Genet* 2010)

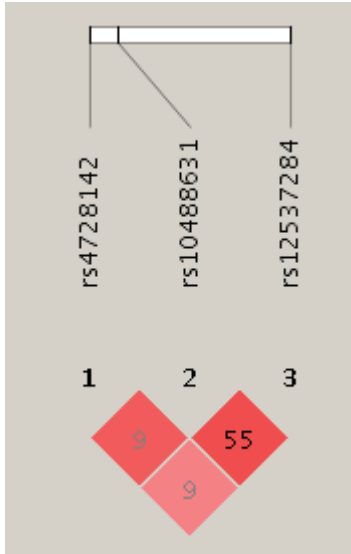

Color scheme: D'/LOD  
Values: R-Squared
